# Supplementary material for: Stabilizing PdII on hollow magnetic mesoporous spheres: a highly active and recyclable catalyst for carbonylative cross-coupling and Suzuki coupling reactions
Source: Royal Society of Chemistry journal article supplement (doi:10.1039/c3nj01293j), 2013-12-16
Supplement: c3nj01293j.pdf [file c3nj01293j.pdf]

# **Stabilizing Pd<sup>II</sup> on hollow magnetic mesoporous spheres: a highly active and recyclable catalyst for carbonylative cross-coupling and Suzuki coupling reactions**

**Jianrui Niu, Mengmeng Liu, Peng Wang, Yu Long, Miao Xie, Rong Li\* and Jiantai Ma\***

---

\* Corresponding author: Tel: +86-931-891-3597. Fax: +86-0931-891-2582  
E-mail address: liyirong@lzu.edu.cn.

\* Corresponding author: Tel: +86-931-891-2311. Fax: +86-0931-891-2582  
E-mail address: majiantai@lzu.edu.cn.

1. Biphenyl.  $^1\text{H}$  NMR ( $\text{CDCl}_3$ , 400 MHz,  $25^\circ\text{C}$ )  
 $\delta$  7.343 (t, 2H,  $J_{\text{HH}}=7.2$  Hz), 7.439 (t, 4H,  $J_{\text{HH}}=7.6$  Hz), 7.594 (d, 4H,  $J_{\text{HH}}=4.0$  Hz)
2. 4-methyl-biphenyl.  $^1\text{H}$  NMR ( $\text{CDCl}_3$ , 400 MHz,  $25^\circ\text{C}$ )  
 $\delta$  2.376 (s, 3H,  $\text{CH}_3$ ), 7.230 (d, 2H,  $J_{\text{HH}}=4.0$  Hz), 7.302 (t, 1H,  $J_{\text{HH}}=7.2$  Hz), 7.405 (t, 2H,  $J_{\text{HH}}=7.6$  Hz), 7.468 (t, 2H,  $J_{\text{HH}}=9.6$  Hz), 7.564 (d, 2H,  $J_{\text{HH}}=4.0$  Hz)
3. 4-Nitro-biphenyl.  $^1\text{H}$  NMR ( $(\text{CD}_3)_2\text{SO}$ , 400 MHz,  $25^\circ\text{C}$ )  
 $\delta$  6.849 (d, 1H,  $J_{\text{HH}}=8.8$  Hz), 7.268 (t, 2H,  $J_{\text{HH}}=7.6$  Hz), 7.402 (t, 2H,  $J_{\text{HH}}=7.8$  Hz), 7.478 (d, 2H,  $J_{\text{HH}}=8.4$  Hz), 7.566 (d, 2H,  $J_{\text{HH}}=7.6$  Hz)
4. 1-biphenyl-4-yl-ethanone.  $^1\text{H}$  NMR ( $\text{CDCl}_3$ , 400 MHz,  $25^\circ\text{C}$ )  
 $\delta$  2.643 (s, 3H,  $\text{COCH}_3$ ), 7.405 (t, 1H,  $J_{\text{HH}}=7.2$  Hz), 7.478 (t, 2H,  $J_{\text{HH}}=7.6$  Hz), 7.633 (d, 2H,  $J_{\text{HH}}=3.6$  Hz), 7.689 (d, 2H,  $J_{\text{HH}}=4.0$  Hz), 8.037 (d, 2H,  $J_{\text{HH}}=4.0$  Hz)
5. 4-methyl-4'-niro-biphenyl.  $^1\text{H}$  NMR ( $(\text{CD}_3)_2\text{SO}$ , 400 MHz,  $25^\circ\text{C}$ )  
 $\delta$  2.365 (s, 3H,  $\text{CH}_3$ ), 7.336 (d, 2H,  $J_{\text{HH}}=4.0$  Hz), 7.685 (d, 2H,  $J_{\text{HH}}=3.6$  Hz), 7.928 (d, 2H,  $^2J_{\text{HH}}=4.0$  Hz), 8.275 (d, 2H,  $J_{\text{HH}}=4.0$  Hz)
6. 4,4'-dimethyl-biphenyl.  $^1\text{H}$  NMR ( $\text{CDCl}_3$ , 400 MHz,  $25^\circ\text{C}$ )  
 $\delta$  2.381 (s, 6H), 7.229 (d,  $J_{\text{HH}}=7.6$  Hz, 4H), 7.473 (d,  $J_{\text{HH}}=8.0$  Hz, 4H)
7. Benzophenone.  $^1\text{H}$  NMR ( $\text{CDCl}_3$ , 400 MHz,  $25^\circ\text{C}$ )  
 $\delta$  7.81 (d,  $J_{\text{HH}}=8.2$  Hz, 4H), 7.60 (m, 2H), 7.50 (t,  $J_{\text{HH}}=7.6$  Hz, 4H)
8. phenyl(p-tolyl)methanone.  $^1\text{H}$  NMR ( $\text{CDCl}_3$ , 400 MHz,  $25^\circ\text{C}$ )  
 $\delta$  7.79 (d,  $J_{\text{HH}}=7.2$  Hz, 2H), 7.723 (d,  $J=8.0$  Hz, 2H), 7.58 (t,  $J_{\text{HH}}=7.4$  Hz, 1H), 7.53 (t,  $J_{\text{HH}}=7.8$  Hz, 2H), 7.29 (d,  $J=8.0$  Hz, 2H), 2.43 (s, 3H)
9. (4-methoxyphenyl)(phenyl)methanone.  $^1\text{H}$  NMR ( $\text{CDCl}_3$ , 400 MHz,  $25^\circ\text{C}$ )  
 $\delta$  7.81 (d,  $J_{\text{HH}}=7.2$  Hz, 2H), 7.75 (d,  $J_{\text{HH}}=5.2$  Hz, 2H), 7.54 (t,  $J_{\text{HH}}=7.2$  Hz, 1H), 7.45 (t,  $J_{\text{HH}}=7.4$  Hz, 2H), 6.98 (d,  $J_{\text{HH}}=7.6$  Hz, 2H), 3.86 (s, 3H)

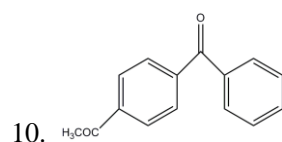

$^1\text{H}$  NMR ( $\text{CDCl}_3$ , 400 MHz,  $25^\circ\text{C}$ )  
 $\delta$  8.06 (d,  $J_{\text{HH}}=8.8$  Hz, 2H), 7.87 (d,  $J_{\text{HH}}=8.4$  Hz, 2H), 7.80 (d,  $J_{\text{HH}}=8.4$  Hz, 2H), 7.62 (t,  $J_{\text{HH}}=8.8$  Hz, 1H), 7.50 (t,  $J_{\text{HH}}=7.5$  Hz, 2H), 2.67 (s, 3H)

11. (4-chlorophenyl)(phenyl)methanone.  $^1\text{H}$  NMR ( $\text{CDCl}_3$ , 400 MHz,  $25^\circ\text{C}$ )  
 $\delta$  7.77 (m, 4H), 7.60 (m, 1H), 7.49 (m, 4H),

12. (2-aminophenyl)(phenyl)methanone.  $^1\text{H}$  NMR ( $\text{CDCl}_3$ , 400 MHz,  $25^\circ\text{C}$ )  
 $\delta$  7.63 (d,  $J_{\text{HH}}=8.1\text{Hz}$ , 2H), 7.50 (d,  $J_{\text{HH}}=7.3\text{Hz}$ , 2H), 7.44 (t,  $J_{\text{HH}}=5.9\text{Hz}$ , 1H), 7.27 (m, 2H), 6.72 (d,  $J_{\text{HH}}=8.0\text{Hz}$ , 1H), 6.58 (t,  $J_{\text{HH}}=7.9\text{Hz}$ , 1H), 6.1 (br, 2H).
13. (4-chlorophenyl)(p-tolyl)methanone.  $^1\text{H}$  NMR ( $\text{CDCl}_3$ , 400 MHz,  $25^\circ\text{C}$ )  
 $\delta$  7.76 (d,  $J_{\text{HH}}=8.4\text{Hz}$ , 2H), 7.70 (d,  $J_{\text{HH}}=8.0\text{Hz}$ , 2H), 7.46 (d,  $J_{\text{HH}}=8.4\text{Hz}$ , 2H), 7.30 (d,  $J_{\text{HH}}=8.0\text{Hz}$ , 2H), 2.44 (s, 3H).
14. (4-chlorophenyl)(4-methoxyphenyl)methanone.  $^1\text{H}$  NMR ( $\text{CDCl}_3$ , 400 MHz,  $25^\circ\text{C}$ )  
 $\delta$  7.79 (m, 2H), 7.70 (m, 2H), 7.44 (m, 2H), 6.97 (m, 2H), 3.87 (s, 3H).
15. (4-methoxyphenyl)(p-tolyl)methanone.  $^1\text{H}$  NMR ( $\text{CDCl}_3$ , 400 MHz,  $25^\circ\text{C}$ )  
 $\delta$  7.82 (m, 2H), 7.68 (d,  $J_{\text{HH}}=8.0\text{Hz}$ , 2H), 7.27 (d,  $J_{\text{HH}}=8.4\text{Hz}$ , 2H), 6.97 (m, 2H), 3.89 (s, 3H), 2.44 (s, 3H).
16. di-p-tolylmethanone.  $^1\text{H}$  NMR ( $\text{CDCl}_3$ , 400 MHz,  $25^\circ\text{C}$ )  
 $\delta$  7.71 (d,  $J_{\text{HH}}=8.0\text{Hz}$ , 4H), 7.27 (d,  $J_{\text{HH}}=8.0\text{Hz}$ , 4H), 2.44 (s, 6H).
